# Supplementary material for: Patient and provider experience and perspectives of a risk-based approach to multidisciplinary chronic kidney disease care: a mixed methods study
Source: Springer Nature journal article supplement (doi:10.1186/s12882-019-1269-2), 2019-03-29
Supplement: MOESM3 [file 16585192]

## Additional File 3. Healthcare Provider Open-ended Survey Questions

### QUESTIONS:

1. Reflecting on the Kidney Failure Risk Equation implementation in the CKD multidisciplinary clinics:
  - a. What have been the greatest benefits?
  - b. What have been the greatest challenges?
  - c. What barriers or facilitators have you experienced transitioning low-risk patients back to general nephrology?
  - d. Do you have any additional comments?
